# Supplementary material
Source: publisher figshare collection journal article supplement (https://acs.figshare.com/ndownloader/files/22295994)
Supplement: Supplementary file 1 [file 22295994]

# Supporting Information

## **Modeling Gene Expression Instability by Programmed and Switchable Polymerization/Nicking DNA Nano-Machineries**

Zhixin Zhou,<sup>‡</sup> Daoqing Fan,<sup>‡</sup> and Itamar Willner\*

Institute of Chemistry, The Minerva Center for Biohybrid Complex Systems, The Hebrew University of Jerusalem, Jerusalem 91904, Israel

<sup>‡</sup>These authors contributed equally.

\*E-mail: [willnea@vms.huji.ac.il](mailto:willnea@vms.huji.ac.il).

Fax: 972-2-6527715.

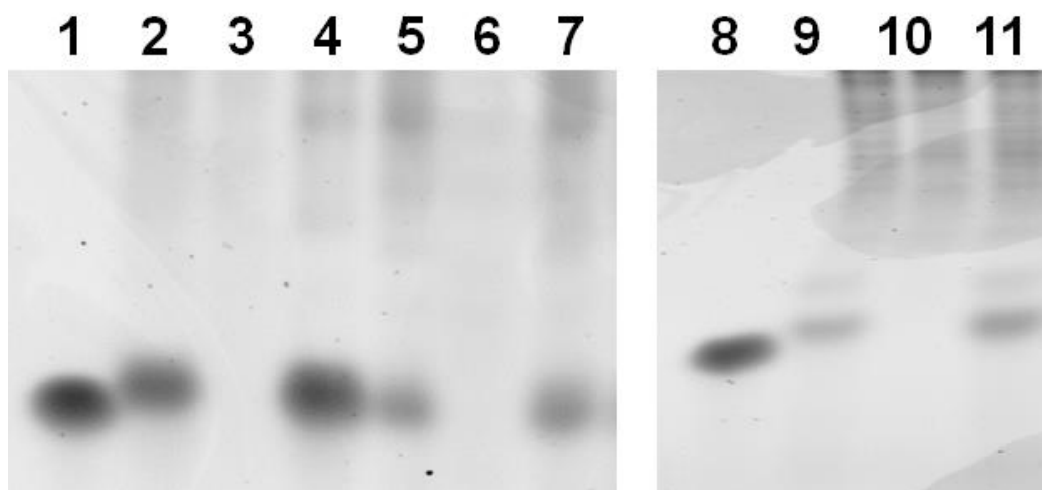

**Figure S1.** Native polyacrylamide gel electrophoresis analysis of the switchable polymerization/nicking machinery using T-A•T triplex as blocker unit and strand (6) as deblocker: Lane 1-reference lane of “gene” (2); lane 2-the polymerization/nicking machinery, in the absence of T-A duplex; lane 3-upon addition of T-A duplex, the blockage of the polymerization/nicking machinery; lane 4-upon the addition of DNA sequence (6) to the T-A•T triplex blocked machinery. Native polyacrylamide gel electrophoresis analysis of the switchable polymerization/nicking machinery using ATP as blocker unit and ATPase as deblocker: Lane 5-the polymerization/nicking machinery, in the absence of ATP; lane 6-upon addition of ATP, the blockage of the polymerization/nicking machinery; lane 7-upon the addition of ATPase to the ATP blocked machinery. Native polyacrylamide gel electrophoresis analysis of the switchable polymerization/nicking machinery using  $\text{Sr}^{2+}$ -ion-stabilized G-quadruplex as blocker unit and kryptofix [2.2.2] (KP) as deblocker: Lane 8-reference lane of “gene” (2); Lane 9-the polymerization/nicking machinery, in the absence of  $\text{Sr}^{2+}$ -ions; lane 10-upon addition of  $\text{Sr}^{2+}$ -ions, the blockage of the polymerization/nicking machinery; lane 11-upon the addition of KP to the  $\text{Sr}^{2+}$ -ions blocked machinery.
